# Supplementary material
Source: publisher figshare collection journal article supplement (https://karger.figshare.com/ndownloader/files/8707612)
Supplement: Supplementary file 1 [file 8707612]

# Supplementary Data

## **(+)-13a-(S)-Deoxytylophorinine, a New Phenanthroindolizidine Anticancer Alkaloid, Sequence-Specifically Interacts with DNA in an Intercalating Manner**

Zhenjia Liu<sup>a</sup>, Haining Lv<sup>b</sup>, Hongyan Li<sup>a</sup>, Yi Zhang<sup>a</sup>, Fuqin Su<sup>a</sup>,  
Song Xu<sup>b</sup>, Yong Li<sup>b</sup>, Yikang Si<sup>c</sup>, Shishan Yu<sup>b</sup>, Xiaoguang  
Chen<sup>a\*</sup>

<sup>a</sup>Department of Pharmacology, Institute of Materia Medica, Peking Union Medical College & Chinese Academy of Medical Sciences, Beijing 100050, China.

<sup>b</sup>Key Laboratory of Bioactive Substances and Resources Utilization of Chinese Herbal Medicine, Ministry of Education, Institute of Materia Medica, Peking Union Medical College & Chinese Academy of Medical Sciences, Beijing 100050, China.

<sup>c</sup>Department of Medicinal Chemistry, Institute of Materia Medica, Peking Union Medical College & Chinese Academy of Medical Sciences, Beijing 100050, China.

\*Corresponding author at: Department of Pharmacology, Institute of Materia Medica, Peking Union Medical College & Chinese Academy of Medical Sciences, #1 Xiannongtan Street, Xuanwu District, Beijing 100050, China. Tel.: +86 10 63165207; fax: +86 10 63017757.

E-mail address: chxg@imm.ac.cn. (Xiaoguang Chen)

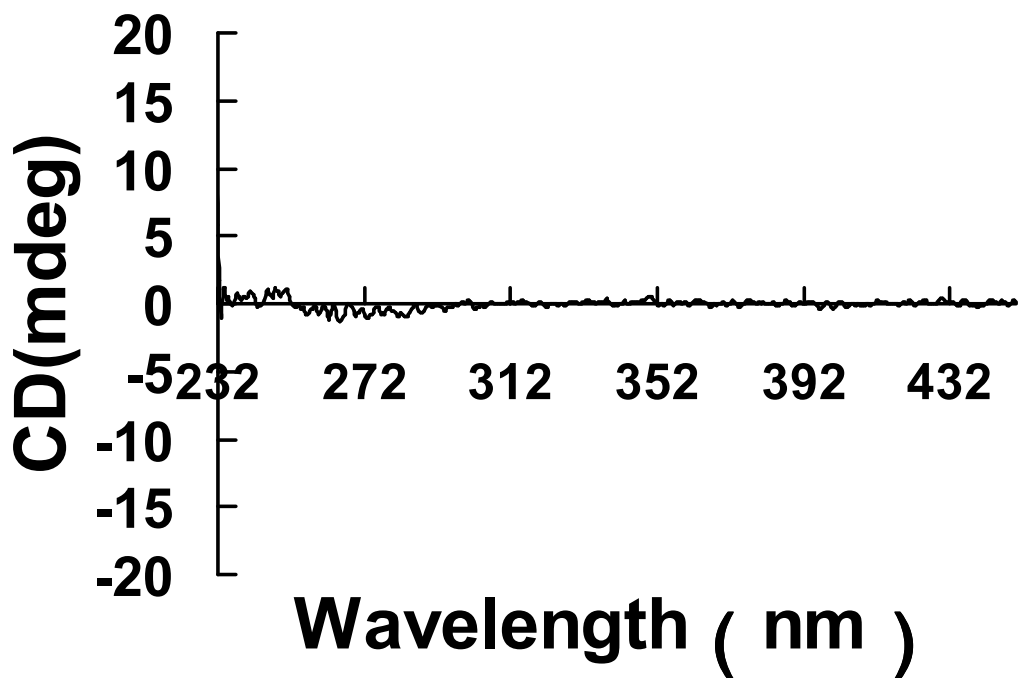

Figure S1. CD spectrum of dimethyl sulphoxide (DMSO, 5% ) in BPES buffer.

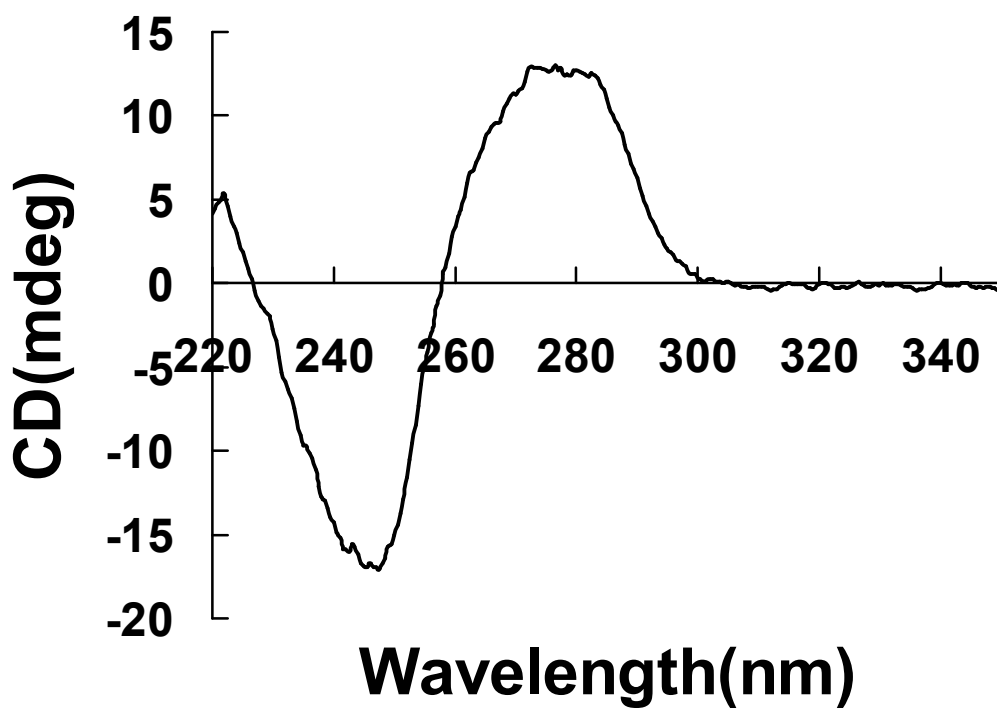

Figure S2. The CD spectrum of CD-DNA ( $3 \times 10^{-5} \text{ M(bp)}$ ) as a standard CD spectrum of DNA.

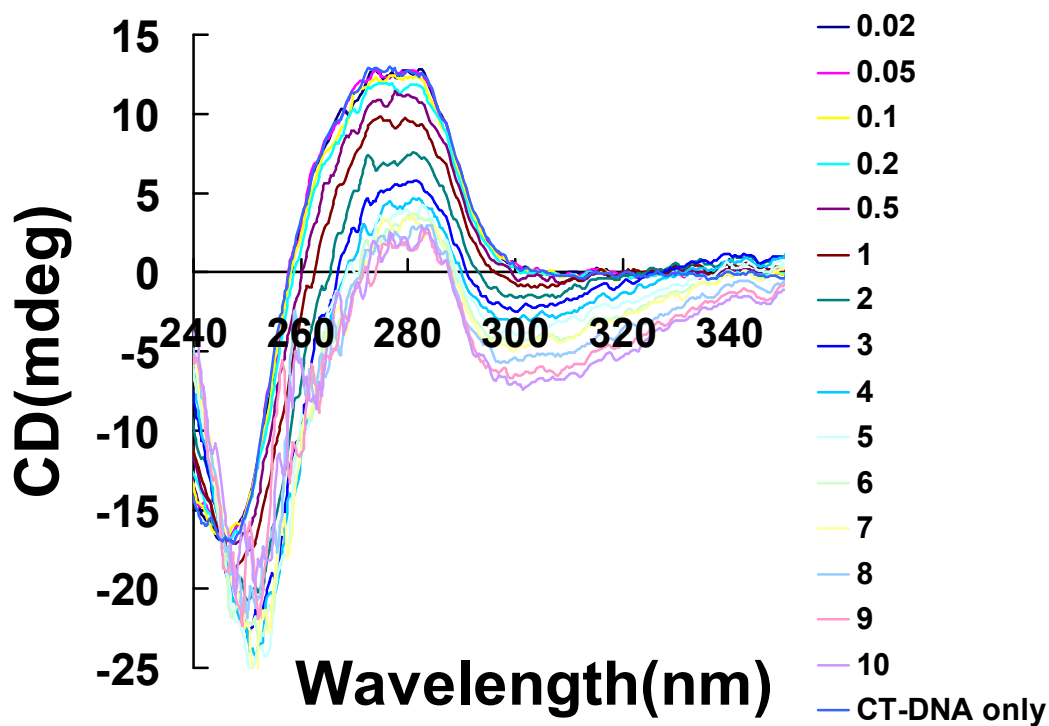

Figure S3. Spectra of the same concentration of DNA in the presence of increasing concentration of CAT with the CAT/DNA ratio (M/ M(bp)) ranging from 0.02 to 10.

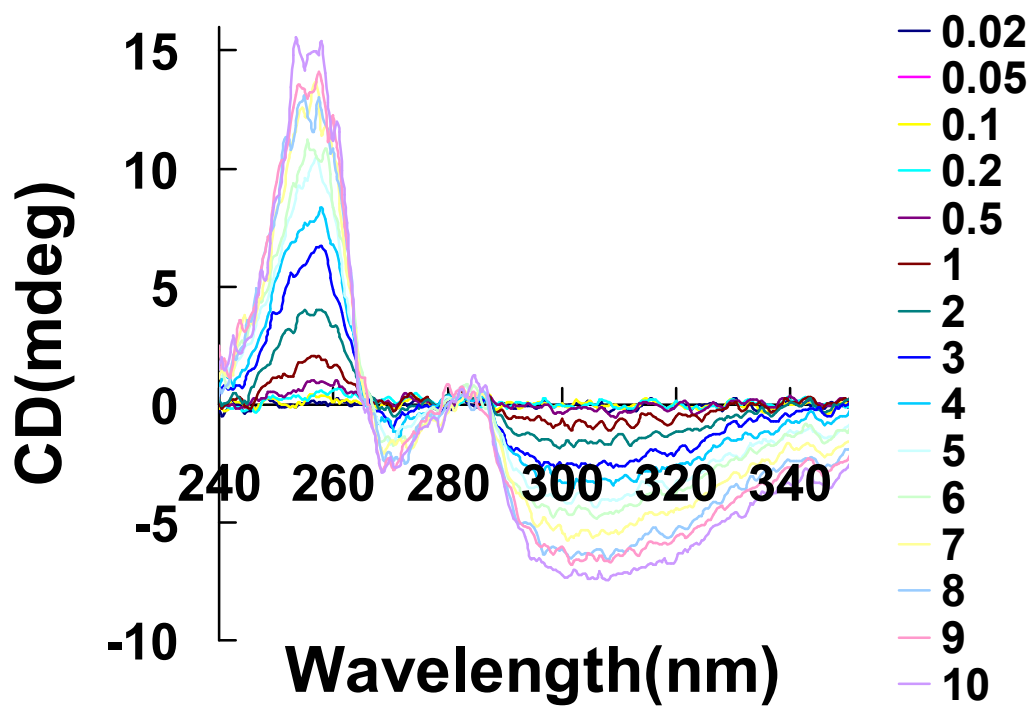

Figure S4. The CD spectra of CAT with the same series of concentrations as figure S3.

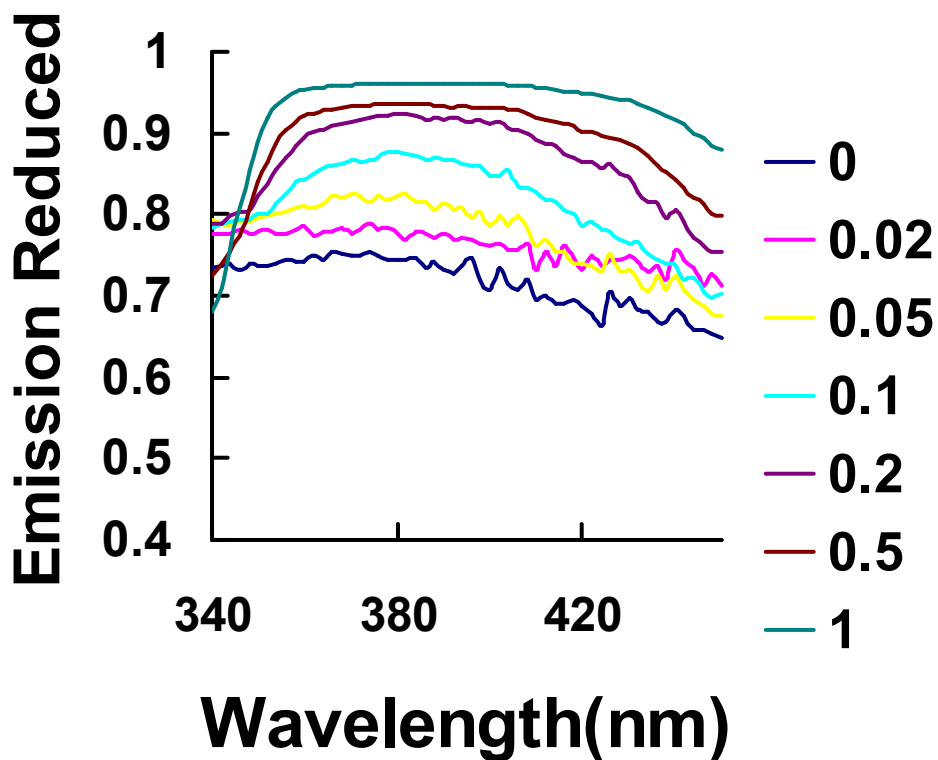

Figure S5. Reduced emissions of different CAT concentrations were plotted with wavelength with the increasing of CAT/DNA ratio (M/ M(bp)) from 0.02 to 1. The magnitudes of reduced emission increased in the wavelength range from all through 350nm to 450nm.

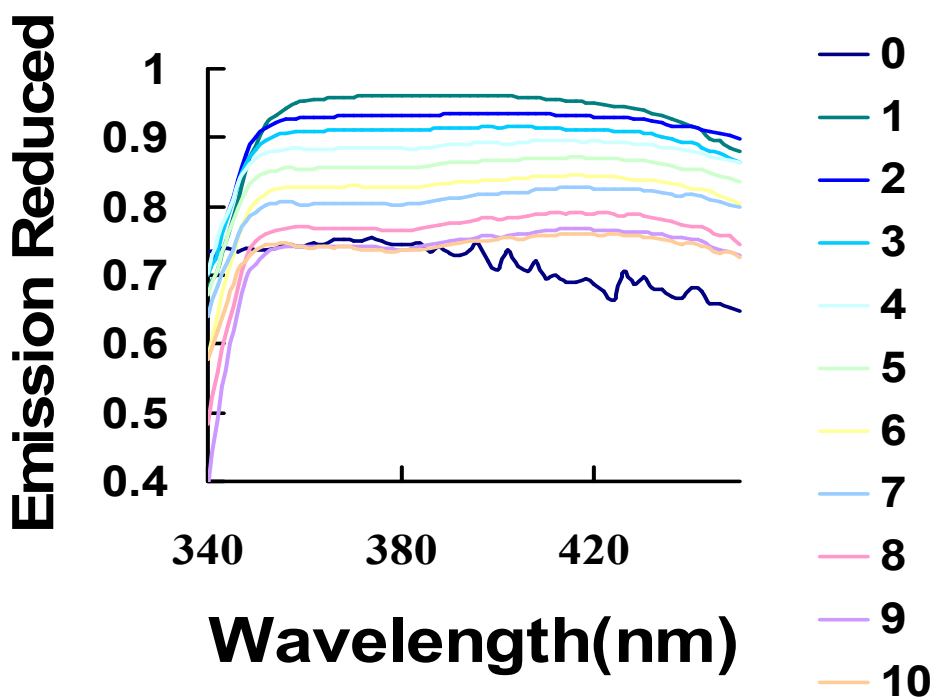

Figure S6. Reduced emissions of different CAT concentrations were plotted with wavelength with the increasing of CAT/DNA ratio (M/ M(bp)) from 1 to 10. The magnitudes of reduced

emission decreased in the wavelength range from all through 350nm to 450nm.

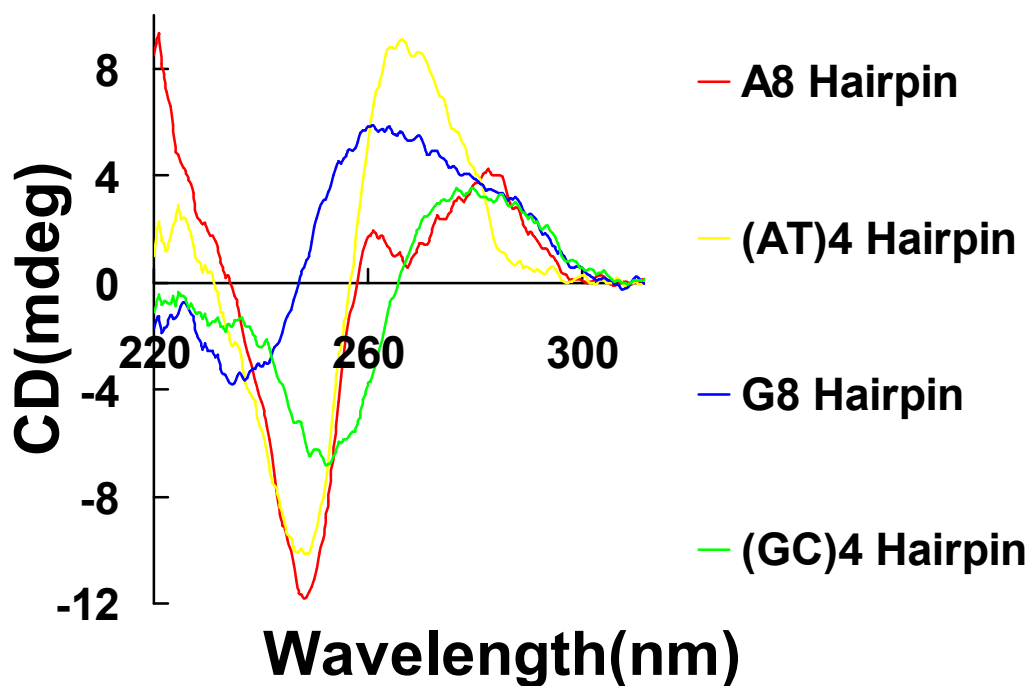

Figure S7. CD spectra of the four short 8bp DNA sequences in BPES buffer with the same concentration,  $3 \times 10^{-5} \text{M}(\text{bp})$ .

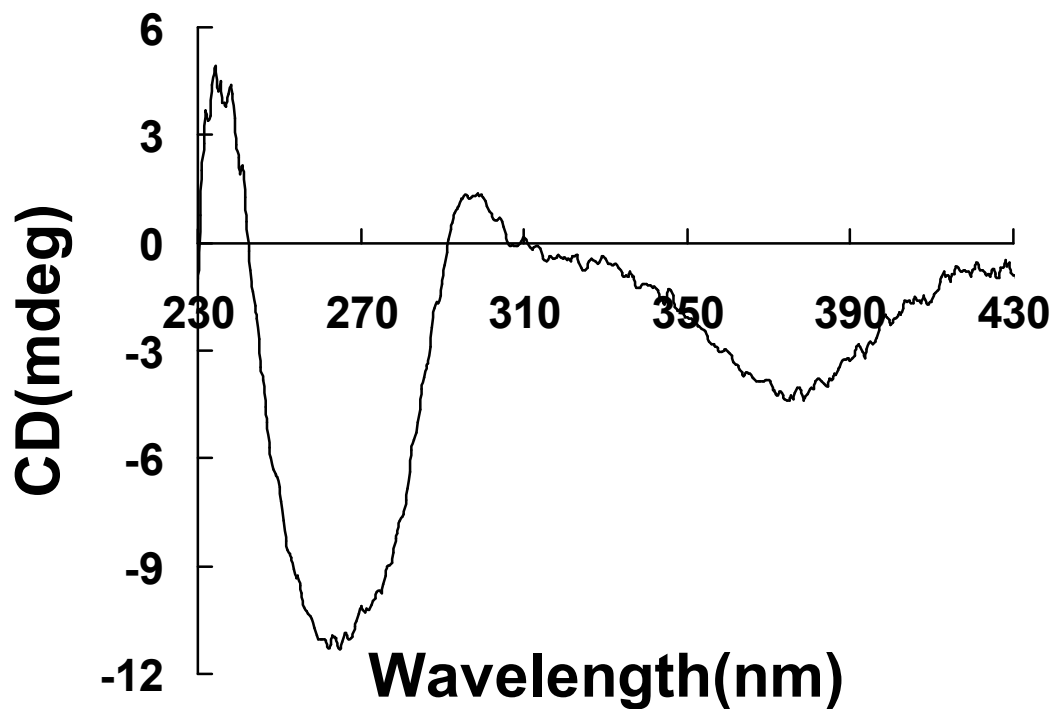

Figure S8. Intrinsic CD spectrum of actinomycin D ( $6 \times 10^{-5} \text{M}$ ) in BPES buffer.
